# Supplementary material
Source: HighWire-hosted journal article supplement (http://ebm.bmjjournals.com/highwire/filestream/141995/field_highwire_adjunct_files/0/116169webonlytable.pdf)
Supplement: 116169webonlytable.pdf [file 116169webonlytable.pdf]

## Aspirin plus dipyridamole was more effective than aspirin alone for preventing vascular events after minor cerebral ischaemia

Halkes PH, van Gijn J, Kappelle LJ, *et al.* Aspirin plus dipyridamole versus aspirin alone after cerebral ischaemia of arterial origin (ESPRIT): randomised controlled trial. *Lancet* 2006;**367**:1665–73.

### Aspirin plus dipyridamole v aspirin alone to prevent vascular events after minor cerebral ischaemia at mean 3.5 years\*

| Outcomes                                 | Aspirin + dipyridamole | Aspirin alone | RRR (95% CI)    | NNT (CI)        |
|------------------------------------------|------------------------|---------------|-----------------|-----------------|
| Composite endpoint†                      | 13%                    | 16%           | 19% (2 to 32)   | 35 (20 to 347)  |
| Death from all causes                    | 6.8%                   | 7.8%          | 12% (–16 to 32) | Not significant |
| Death from all vascular causes           | 3.2%                   | 4.4%          | 25% (–10 to 48) | Not significant |
| Death from all vascular causes or stroke | 10%                    | 12%           | 21% (3 to 36)   | 39 (23 to 287)  |
| All major ischaemic events               | 10%                    | 13%           | 18% (–1 to 33)  | Not significant |
| All vascular events                      | 11%                    | 14%           | 21% (3 to 35)   | 35 (21 to 257)  |
| First cardiac event                      | 3.2%                   | 4.4%          | 27% (–8 to 50)  | Not significant |
| Major bleeding event                     | 2.6%                   | 3.9%          | 33% (–3 to 56)  | Not significant |

\*Abbreviations defined in glossary; RRR, NNT, and CI calculated from hazard ratios in article. †Death from all vascular causes, stroke, myocardial infarction, or major bleeding event.
